# Supplementary material for: Do National Export Promotion Programs in Indonesia support export competitiveness?
Source: PubMed Central journal article supplement — Heliyon. 2023 Jun 2;9(6):e16918. doi: 10.1016/j.heliyon.2023.e16918 (PMC10275995; doi:10.1016/j.heliyon.2023.e16918), 2023-06-02
Supplement: mmc1.pdf [file mmc1.pdf]

**EXPORT PROMOTION PROGRAM QUESTIONNAIRE:  
EXPORT BARRIERS AND EXPORT PERFORMANCE**

|                                      |       |
|--------------------------------------|-------|
| Surveyor Name                        | _____ |
| Respondent Name                      | _____ |
| Company name                         | _____ |
| Respondent's Email and Mobile Number |       |

**Informed Consent:**

The Survey also collects firm-specific data (location, size, strategic alliances, export markets, etc.) and includes a consent form designed to get survey participants' informed written consent that the data collected will be used for research and publication purposes keeping personal details confidential.

Any personal information that "could reasonably identify respondents was removed or changed before data files were shared with other researchers or results are made public."

"I agree that research data gathered for the study may be published or made available provided my name or other identifying information is not used."

"I understand that the research data, without any personal information that could identify me (not linked to me) may be shared with others."

## BLOCK 1. COMPANY PROFILE

|      |                                                                                                                        |                                                                                                                                                                                                                                                                                                                                                                                                                                                                                                                            |
|------|------------------------------------------------------------------------------------------------------------------------|----------------------------------------------------------------------------------------------------------------------------------------------------------------------------------------------------------------------------------------------------------------------------------------------------------------------------------------------------------------------------------------------------------------------------------------------------------------------------------------------------------------------------|
| 101. | Which of the following categories best describes the industry in which Company operates                                | <input type="checkbox"/> 1. Food & beverage<br><input type="checkbox"/> 2. Textiles & textile products<br><input type="checkbox"/> 3. Electricity, electronics, and machinery<br><input type="checkbox"/> 4. Chemistry and pharmacy<br><input type="checkbox"/> 5. Automotive and transportation<br><input type="checkbox"/> 6. Handicraft, KRYA<br><input type="checkbox"/> 7. Furniture<br><input type="checkbox"/> 8. Agricultural commodities (coffee, tea, pepper, cocoa, etc.)<br><input type="checkbox"/> 9. Others |
| 102  | Company location                                                                                                       | Regency/City:<br>Province:                                                                                                                                                                                                                                                                                                                                                                                                                                                                                                 |
| 103  | Company in Industrial Estate                                                                                           | <input type="checkbox"/> 1. Yes<br><input type="checkbox"/> 2. No                                                                                                                                                                                                                                                                                                                                                                                                                                                          |
| 104  | Company in Special Economic Zones                                                                                      | <input type="checkbox"/> 1. Yes<br><input type="checkbox"/> 2. No                                                                                                                                                                                                                                                                                                                                                                                                                                                          |
| 105  | Current total number of workforce (including permanent and contract workers involved in production and administration) | <input type="checkbox"/> 5-19 people<br><input type="checkbox"/> 20-99 people<br><input type="checkbox"/> >100 people                                                                                                                                                                                                                                                                                                                                                                                                      |
| 106  | Proportion of exports to total production (average over the last three years)                                          | <input type="checkbox"/> <10%<br><input type="checkbox"/> 10%-40%<br><input type="checkbox"/> 41%-75%<br><input type="checkbox"/> >75%-100%                                                                                                                                                                                                                                                                                                                                                                                |

|     |                                                                                                       |                                                                                                                                                                                                                                                                                             |
|-----|-------------------------------------------------------------------------------------------------------|---------------------------------------------------------------------------------------------------------------------------------------------------------------------------------------------------------------------------------------------------------------------------------------------|
| 107 | Company's age since the establishment                                                                 | <input type="checkbox"/> < 2 years<br><input type="checkbox"/> 3-5 years<br><input type="checkbox"/> 6-10 years<br><input type="checkbox"/> 11-15 years old<br><input type="checkbox"/> 16-20 years old                                                                                     |
| 108 | Length of export experience                                                                           | <input type="checkbox"/> Less than 1 year<br><input type="checkbox"/> < 2 years<br><input type="checkbox"/> 3-5 years<br><input type="checkbox"/> 6-10 years<br><input type="checkbox"/> 11-15 years old<br><input type="checkbox"/> 16-20 years old<br><input type="checkbox"/> > 20 years |
| 109 | Current ratio of production workforce (non-administration/ management workers) to total workers       | <input type="checkbox"/> < 25%<br><input type="checkbox"/> 25-50%<br><input type="checkbox"/> 50-75%<br><input type="checkbox"/> >75%                                                                                                                                                       |
| 110 | Special unit/division that handles exports                                                            | <input type="checkbox"/> 1. Yes<br><input type="checkbox"/> 2. No                                                                                                                                                                                                                           |
| 111 | Source(s) of legal services (for contracts, permits, brands etc.) (more than one answer may be given) | <input type="checkbox"/> 1. Government<br><input type="checkbox"/> 2. Internal<br><input type="checkbox"/> 3. Consultant<br><input type="checkbox"/> 4. Not available                                                                                                                       |
| 112 | Type of goods Company exports (answer can be more than one)                                           | <input type="checkbox"/> 1. Raw Material<br><input type="checkbox"/> 2. Semi-finished products<br><input type="checkbox"/> 3. End products                                                                                                                                                  |
| 113 | Exporter status                                                                                       | <input type="checkbox"/> 1. Regular exporter until now<br><input type="checkbox"/> 2. Export is not regular<br><input type="checkbox"/> 3. Have ever exported (in the last year)                                                                                                            |

|     |                                                                                                                      |                                                                                                                                                                                                                                                                                                                                                                                                                                                                                                                                                                         |
|-----|----------------------------------------------------------------------------------------------------------------------|-------------------------------------------------------------------------------------------------------------------------------------------------------------------------------------------------------------------------------------------------------------------------------------------------------------------------------------------------------------------------------------------------------------------------------------------------------------------------------------------------------------------------------------------------------------------------|
| 114 | Export market(s) (answer can be more than one)                                                                       | <input type="checkbox"/> 1. ASEAN<br><input type="checkbox"/> 2. East Asia (China, Japan, South Korea, Hong Kong, Taiwan, etc.)<br><input type="checkbox"/> 3. South Asia (India, Pakistan, Sri Lanka, Bangladesh, etc.)<br><input type="checkbox"/> 4. Europe and Russia<br><input type="checkbox"/> 5. North America (The United States, Canada, Mexico)<br><input type="checkbox"/> 6. Central and South America<br><input type="checkbox"/> 7. Africa<br><input type="checkbox"/> 8. The Middle East<br><input type="checkbox"/> 9. Australia, New Zealand, Oceania |
| 115 | Company's main activity (more than one answer may be given)                                                          | <input type="checkbox"/> 1. Exporter and producer<br><input type="checkbox"/> 2. Product design<br><input type="checkbox"/> 3. Exporter but not producing (trader)                                                                                                                                                                                                                                                                                                                                                                                                      |
| 116 | Does the company have an international brand or does it have its own export brand?                                   | <input type="checkbox"/> 1. Yes (Company has an international brand)<br><input type="checkbox"/> 2. No (Company has no brand)                                                                                                                                                                                                                                                                                                                                                                                                                                           |
| 117 | Logistics management in foreign markets (more than one answer may be given)                                          | <input type="checkbox"/> 1. Independent<br><input type="checkbox"/> 2. Through traders<br><input type="checkbox"/> 3. Through forwarding<br><input type="checkbox"/> 4. Association<br><input type="checkbox"/> 5. Cooperative                                                                                                                                                                                                                                                                                                                                          |
| 118 | Company partners with foreign parties (in foreign capital, technology cooperation, branding, outsourcing, logistics) | <input type="checkbox"/> 1. Yes<br><input type="checkbox"/> 2. No                                                                                                                                                                                                                                                                                                                                                                                                                                                                                                       |
|     |                                                                                                                      |                                                                                                                                                                                                                                                                                                                                                                                                                                                                                                                                                                         |

## BLOCK II. UTILISATION OF EXPORT PROMOTION PROGRAM

### CHARGING INSTRUCTIONS

1. Only a manager or management staff in charge of or involved in EXPORT activities can fill out the questionnaire.
2. Provide a response ranging from (1) for STRONGLY DISAGREE to (7) for STRONGLY AGREE according to the company's circumstances.
3. To respond to specific statements, TICK THE OPTION that represents your company's experience.
4. To respond to ranking questions, NUMBER EACH ITEM FROM 1 TO 5, starting with the most to the least.
5. Answer according to the company's experience for the last three years.

### Block II. A. Information Sector of the Export Promotion Program

1. The Information Export Promotion Program is a government program that aims to encourage and facilitate exports by providing the necessary information. This program is implemented by several ministries (such as the Ministry of Trade, Kemenkop UKM, Ministry of Foreign Affairs), the provincial and municipal level offices, and other agencies
2. Please answer according to the company's experience in the last three years.

| No  | Issue: Information Regarding Export Planning/Activities                                                                                                                                             | SCALE |   |   |   |   |   |   |
|-----|-----------------------------------------------------------------------------------------------------------------------------------------------------------------------------------------------------|-------|---|---|---|---|---|---|
|     |                                                                                                                                                                                                     | 1     | 2 | 3 | 4 | 5 | 6 | 7 |
| 2A1 | Your company periodically uses information on foreign market opportunities in planning/export activities, such as market information, challenges/opportunities, economic indicators, etc.           |       |   |   |   |   |   |   |
| 2A2 | Your company periodically uses export requirements and technical information, such as tariffs, customs documents, technical regulations, customs requirements, etc., in planning/export activities. |       |   |   |   |   |   |   |
| 2A3 | Your company regularly uses export publication information, such as export bulletins, reports, mailing lists, and directories, in export planning/activities.                                       |       |   |   |   |   |   |   |

|                                                                                                                                                                                                                                                                                                                                                                                                                                           |                                                                                                                                                                                                |                                                                                                                                           |   |   |   |   |   |   |
|-------------------------------------------------------------------------------------------------------------------------------------------------------------------------------------------------------------------------------------------------------------------------------------------------------------------------------------------------------------------------------------------------------------------------------------------|------------------------------------------------------------------------------------------------------------------------------------------------------------------------------------------------|-------------------------------------------------------------------------------------------------------------------------------------------|---|---|---|---|---|---|
| 2A4                                                                                                                                                                                                                                                                                                                                                                                                                                       | Your company periodically uses sector-specific and special provision information, such as quality standards, strategic opportunities, and business cooperation, in planning/export activities. |                                                                                                                                           |   |   |   |   |   |   |
| 2A5                                                                                                                                                                                                                                                                                                                                                                                                                                       | Your company regularly uses information about export destination countries, such as cooperation agreements, country profiles, culture, and other information, in planning/export activities.   |                                                                                                                                           |   |   |   |   |   |   |
| 2A6                                                                                                                                                                                                                                                                                                                                                                                                                                       | Which of these sources does your company obtain the above information from? (more than one answer may be given)                                                                                | <input type="checkbox"/> Government<br><input type="checkbox"/> Non-government<br><input type="checkbox"/> Independent (Internal Company) |   |   |   |   |   |   |
| 2A7                                                                                                                                                                                                                                                                                                                                                                                                                                       | Limited access to up-to-date information becomes an obstacle in planning/export activities.                                                                                                    |                                                                                                                                           |   |   |   |   |   |   |
| 2A8                                                                                                                                                                                                                                                                                                                                                                                                                                       | If the answer to the previous question is on a scale of 5 to 7, then rank the problems related to information from the most challenging (1) to the least (4)                                   |                                                                                                                                           |   |   |   |   |   |   |
| 2A8_a                                                                                                                                                                                                                                                                                                                                                                                                                                     | Limited information to find overseas buyers/customers.                                                                                                                                         |                                                                                                                                           |   |   |   |   |   |   |
| 2A8_b                                                                                                                                                                                                                                                                                                                                                                                                                                     | Limited information about the characteristics and requirements of exports in destination countries.                                                                                            |                                                                                                                                           |   |   |   |   |   |   |
| 2A8_c                                                                                                                                                                                                                                                                                                                                                                                                                                     | Limited information about certain sectors that exporters will enter.                                                                                                                           |                                                                                                                                           |   |   |   |   |   |   |
| 2A8_d                                                                                                                                                                                                                                                                                                                                                                                                                                     | Limited information about export documentation, requirements, regulations, and tariffs                                                                                                         |                                                                                                                                           |   |   |   |   |   |   |
| <b>Block II.B. Export Promotion Program in Education and Training</b>                                                                                                                                                                                                                                                                                                                                                                     |                                                                                                                                                                                                |                                                                                                                                           |   |   |   |   |   |   |
| 1. The Information Export Promotion Program is a government program that aims to encourage and facilitate exports by providing the necessary information. This program is implemented by several ministries (such as the Ministry of Trade, Kemenkop UKM, Ministry of Foreign Affairs), the provincial and municipal level offices, and other agencies<br>2. Please answer according to the company's experience in the last three years. |                                                                                                                                                                                                |                                                                                                                                           |   |   |   |   |   |   |
| No                                                                                                                                                                                                                                                                                                                                                                                                                                        | <b>Issue: Export Education and Training</b>                                                                                                                                                    | Scale                                                                                                                                     |   |   |   |   |   |   |
|                                                                                                                                                                                                                                                                                                                                                                                                                                           |                                                                                                                                                                                                | 1                                                                                                                                         | 2 | 3 | 4 | 5 | 6 | 7 |

|       |                                                                                                                                                                                                                                                                              |                                                                                                                                         |  |  |  |  |  |  |
|-------|------------------------------------------------------------------------------------------------------------------------------------------------------------------------------------------------------------------------------------------------------------------------------|-----------------------------------------------------------------------------------------------------------------------------------------|--|--|--|--|--|--|
| 2B1   | Staff at your company regularly attend basic export training, such as export starters, market surveys, business planning, potential market identification, finding buyers, SWOT analysis etc.                                                                                |                                                                                                                                         |  |  |  |  |  |  |
| 2B2   | Staff at your company regularly attend export documentation and management training, such as bill of lading, letter of credit, shipping insurance etc.                                                                                                                       |                                                                                                                                         |  |  |  |  |  |  |
| 2B3   | Staff at your company regularly participate in export counselling and coaching (e.g., marketing strategy development and finding buyers) and receive assistance in handling certain problems (e.g., bad debtors, competitor assessments, and foreign exchange transactions). |                                                                                                                                         |  |  |  |  |  |  |
| 2B4   | Staff at your company regularly access online export training on INSW, trade contracts, import-export cargoes, incoterms, finding buyers etc.                                                                                                                                |                                                                                                                                         |  |  |  |  |  |  |
| 2B5   | Staff in your company regularly attend export training through e-commerce.                                                                                                                                                                                                   |                                                                                                                                         |  |  |  |  |  |  |
| 2B6   | Which education and training do your staff attend? (more than one answer may be given )                                                                                                                                                                                      | <input type="checkbox"/> Government held<br><input type="checkbox"/> Non-government held<br><input type="checkbox"/> Independently held |  |  |  |  |  |  |
| 2B7   | Overall, limited access, low frequency, and lack of export training variety become an obstacle in planning/export activities                                                                                                                                                 |                                                                                                                                         |  |  |  |  |  |  |
| 2B8   | If the answer to the previous question is on a scale of 5 to 7, then rank the problems related to export education and training from the most (1) to the least challenging (4).                                                                                              |                                                                                                                                         |  |  |  |  |  |  |
| 2B8_a | Export documentation and export management training                                                                                                                                                                                                                          |                                                                                                                                         |  |  |  |  |  |  |
| 2B8_b | Basic export training (export starters, market survey, business plan preparation, market potential identification, finding buyers, SWOT analysis)                                                                                                                            |                                                                                                                                         |  |  |  |  |  |  |
| 2B8_c | Export counselling and export business coaching                                                                                                                                                                                                                              |                                                                                                                                         |  |  |  |  |  |  |
| 2B8_d | Foreign language training                                                                                                                                                                                                                                                    |                                                                                                                                         |  |  |  |  |  |  |

| <b>Block II.C. Export Promotion Program for Trade Mobility</b>                                                                                                                                                                                                                                                                                                                                                                                       |                                                                                                                                                                                                             |                                                                                                                         |   |   |   |   |   |   |
|------------------------------------------------------------------------------------------------------------------------------------------------------------------------------------------------------------------------------------------------------------------------------------------------------------------------------------------------------------------------------------------------------------------------------------------------------|-------------------------------------------------------------------------------------------------------------------------------------------------------------------------------------------------------------|-------------------------------------------------------------------------------------------------------------------------|---|---|---|---|---|---|
| <p>1. The Information Export Promotion Program is a government program that aims to encourage and facilitate exports by providing the necessary information. This program is implemented by several ministries (such as the Ministry of Trade, Kemenkop UKM, Ministry of Foreign Affairs), the provincial and municipal level offices, and other agencies</p> <p>2. Please answer according to the company's experience in the last three years.</p> |                                                                                                                                                                                                             |                                                                                                                         |   |   |   |   |   |   |
| No.                                                                                                                                                                                                                                                                                                                                                                                                                                                  | Issue: Trade Mobility                                                                                                                                                                                       | Scale                                                                                                                   |   |   |   |   |   |   |
|                                                                                                                                                                                                                                                                                                                                                                                                                                                      |                                                                                                                                                                                                             | 1                                                                                                                       | 2 | 3 | 4 | 5 | 6 | 7 |
| 2C1                                                                                                                                                                                                                                                                                                                                                                                                                                                  | Your company regularly attends trade shows for foreign markets                                                                                                                                              |                                                                                                                         |   |   |   |   |   |   |
| 2C2                                                                                                                                                                                                                                                                                                                                                                                                                                                  | Your company regularly participates in foreign trade missions, such as embassies abroad, ITPC, and trade attaches.                                                                                          |                                                                                                                         |   |   |   |   |   |   |
| 2C3                                                                                                                                                                                                                                                                                                                                                                                                                                                  | Your company capitalises on the support from foreign trade offices, such as the Indonesian embassies in foreign countries, ITPC, and trade attaches.                                                        |                                                                                                                         |   |   |   |   |   |   |
| 2C4                                                                                                                                                                                                                                                                                                                                                                                                                                                  | Your company leverage the use of digital platforms, such as B2B online platforms, product display, product information, company profile, buyer communication channels, e-catalogue, and online marketplace) |                                                                                                                         |   |   |   |   |   |   |
| 2C5                                                                                                                                                                                                                                                                                                                                                                                                                                                  | Which institution organises trade mobility activities, such as trade missions, exhibitions, and business matching, that your company participates in? ( more than one answer may be given)                  | <input type="checkbox"/> Government<br><input type="checkbox"/> Non-government<br><input type="checkbox"/> Your company |   |   |   |   |   |   |
| 2C6                                                                                                                                                                                                                                                                                                                                                                                                                                                  | Overall, limitations regarding access and frequency of trade mobility activities (such as trade missions, exhibitions, and business matching) become an obstacle in planning/export activities.             |                                                                                                                         |   |   |   |   |   |   |
| 2C7                                                                                                                                                                                                                                                                                                                                                                                                                                                  | If the answer to the previous question is on a scale of 5 to 7, then rank the problems related to trade mobility activities from the most (1) to the least challenging (4).                                 |                                                                                                                         |   |   |   |   |   |   |
| 2C7_a                                                                                                                                                                                                                                                                                                                                                                                                                                                | Limited trade show events                                                                                                                                                                                   |                                                                                                                         |   |   |   |   |   |   |



| 2C7_b                                                                                                                                                                                                                                                                                                                                                                                                                                                | Limited overseas trade mission events                                                                                                                               |                                                                                                                                                                               |   |   |   |   |   |   |  |
|------------------------------------------------------------------------------------------------------------------------------------------------------------------------------------------------------------------------------------------------------------------------------------------------------------------------------------------------------------------------------------------------------------------------------------------------------|---------------------------------------------------------------------------------------------------------------------------------------------------------------------|-------------------------------------------------------------------------------------------------------------------------------------------------------------------------------|---|---|---|---|---|---|--|
| 2C7_c                                                                                                                                                                                                                                                                                                                                                                                                                                                | Limited opportunities to obtain support from overseas trade offices                                                                                                 |                                                                                                                                                                               |   |   |   |   |   |   |  |
| <b>Block II.D Export Promotion Program in Financial Aid Sector</b>                                                                                                                                                                                                                                                                                                                                                                                   |                                                                                                                                                                     |                                                                                                                                                                               |   |   |   |   |   |   |  |
| <p>1. The Information Export Promotion Program is a government program that aims to encourage and facilitate exports by providing the necessary information. This program is implemented by several ministries (such as the Ministry of Trade, Kemenkop UKM, Ministry of Foreign Affairs), the provincial and municipal level offices, and other agencies</p> <p>2. Please answer according to the company's experience in the last three years.</p> |                                                                                                                                                                     |                                                                                                                                                                               |   |   |   |   |   |   |  |
|                                                                                                                                                                                                                                                                                                                                                                                                                                                      |                                                                                                                                                                     |                                                                                                                                                                               |   |   |   |   |   |   |  |
| No                                                                                                                                                                                                                                                                                                                                                                                                                                                   | Issue: Financial Aid                                                                                                                                                | Scale                                                                                                                                                                         |   |   |   |   |   |   |  |
|                                                                                                                                                                                                                                                                                                                                                                                                                                                      |                                                                                                                                                                     | 1                                                                                                                                                                             | 2 | 3 | 4 | 5 | 6 | 7 |  |
| 2D1                                                                                                                                                                                                                                                                                                                                                                                                                                                  | Your company periodically applies for credit for export activities.                                                                                                 |                                                                                                                                                                               |   |   |   |   |   |   |  |
| 2D2                                                                                                                                                                                                                                                                                                                                                                                                                                                  | Your company periodically applies for export credit guarantees.                                                                                                     |                                                                                                                                                                               |   |   |   |   |   |   |  |
| 2D3                                                                                                                                                                                                                                                                                                                                                                                                                                                  | Your company regularly obtains financial assistance for export-supporting activities, such as subsidies to participate in exhibitions, trade missions, etc.         |                                                                                                                                                                               |   |   |   |   |   |   |  |
| 2D4                                                                                                                                                                                                                                                                                                                                                                                                                                                  | Which sources does your company access finance from? (more than one answer may be given)                                                                            | <input type="checkbox"/> Internal Finance<br><input type="checkbox"/> Government<br><input type="checkbox"/> External Non-government (Banks and other financial institutions) |   |   |   |   |   |   |  |
| 2D5                                                                                                                                                                                                                                                                                                                                                                                                                                                  | Overall, limited access to finance is an obstacle in planning/export activities                                                                                     |                                                                                                                                                                               |   |   |   |   |   |   |  |
| 2D6                                                                                                                                                                                                                                                                                                                                                                                                                                                  | If the answer to the previous question is on a scale of 5 to 7, then rank the problems related to access to finance from the most (1) to the least challenging (3). |                                                                                                                                                                               |   |   |   |   |   |   |  |
| 2D6_a                                                                                                                                                                                                                                                                                                                                                                                                                                                | Export credit                                                                                                                                                       |                                                                                                                                                                               |   |   |   |   |   |   |  |
| 2D6_b                                                                                                                                                                                                                                                                                                                                                                                                                                                | Export credit guarantee                                                                                                                                             |                                                                                                                                                                               |   |   |   |   |   |   |  |

| 2D6_c                                                                                                                                                                                                                                                                                                                                                                                                                                                | Fund transfer assistance from abroad                                                                                                                                                                         |       |   |   |   |   |   |   |  |
|------------------------------------------------------------------------------------------------------------------------------------------------------------------------------------------------------------------------------------------------------------------------------------------------------------------------------------------------------------------------------------------------------------------------------------------------------|--------------------------------------------------------------------------------------------------------------------------------------------------------------------------------------------------------------|-------|---|---|---|---|---|---|--|
| <b>Block III. Export Related Organization Resources</b>                                                                                                                                                                                                                                                                                                                                                                                              |                                                                                                                                                                                                              |       |   |   |   |   |   |   |  |
| <b>Block III.A. Managerial Resources</b>                                                                                                                                                                                                                                                                                                                                                                                                             |                                                                                                                                                                                                              |       |   |   |   |   |   |   |  |
| <p>1. The Information Export Promotion Program is a government program that aims to encourage and facilitate exports by providing the necessary information. This program is implemented by several ministries (such as the Ministry of Trade, Kemenkop UKM, Ministry of Foreign Affairs), the provincial and municipal level offices, and other agencies</p> <p>2. Please answer according to the company's experience in the last three years.</p> |                                                                                                                                                                                                              |       |   |   |   |   |   |   |  |
| No                                                                                                                                                                                                                                                                                                                                                                                                                                                   | Issue: Managerial Resources                                                                                                                                                                                  | Scale |   |   |   |   |   |   |  |
|                                                                                                                                                                                                                                                                                                                                                                                                                                                      |                                                                                                                                                                                                              | 1     | 2 | 3 | 4 | 5 | 6 | 7 |  |
| 3A1                                                                                                                                                                                                                                                                                                                                                                                                                                                  | Management has an interest/commitment to export, including export programs, export activities, special export policies, and budgeting.                                                                       |       |   |   |   |   |   |   |  |
| 3A2                                                                                                                                                                                                                                                                                                                                                                                                                                                  | Management has managerial skills in the export sector, such as planning, managing, and coordinating.                                                                                                         |       |   |   |   |   |   |   |  |
| 3A3                                                                                                                                                                                                                                                                                                                                                                                                                                                  | Management has experience with overseas markets, such as export experience, global sales, international marketing, and logistics.                                                                            |       |   |   |   |   |   |   |  |
| 3A4                                                                                                                                                                                                                                                                                                                                                                                                                                                  | Management has a positive reward system in supporting export activities, such as incentives, promotions, and appreciation for employees regarding export achievements, export opportunity discoveries, etc.) |       |   |   |   |   |   |   |  |
| 3A5                                                                                                                                                                                                                                                                                                                                                                                                                                                  | The number of personnel is sufficient to support export activities carried out by your company.                                                                                                              |       |   |   |   |   |   |   |  |
| 3A6                                                                                                                                                                                                                                                                                                                                                                                                                                                  | Your company has personnel/staff specially trained on export.                                                                                                                                                |       |   |   |   |   |   |   |  |
| 3A7                                                                                                                                                                                                                                                                                                                                                                                                                                                  | Overall, limited managerial resources are an obstacle in planning/export activities.                                                                                                                         |       |   |   |   |   |   |   |  |

| 3A8                                                                                                                                                                                                                                                                                                                                                                                                                                                  | If the answer to the previous question is on a scale of 5 to 7, then rank the problems related to managerial resources from the most (1) to the least challenging (4).                  |       |   |   |   |   |   |
|------------------------------------------------------------------------------------------------------------------------------------------------------------------------------------------------------------------------------------------------------------------------------------------------------------------------------------------------------------------------------------------------------------------------------------------------------|-----------------------------------------------------------------------------------------------------------------------------------------------------------------------------------------|-------|---|---|---|---|---|
| 3A8_a                                                                                                                                                                                                                                                                                                                                                                                                                                                | Qualifications/competencies of managers and staff in export                                                                                                                             |       |   |   |   |   |   |
| 3A8_b                                                                                                                                                                                                                                                                                                                                                                                                                                                | Allocation of staff numbers to support export activities                                                                                                                                |       |   |   |   |   |   |
| 3A8_c                                                                                                                                                                                                                                                                                                                                                                                                                                                | Manager's experience in handling foreign markets                                                                                                                                        |       |   |   |   |   |   |
| 3A8_d                                                                                                                                                                                                                                                                                                                                                                                                                                                | Management's commitment to opening up overseas markets                                                                                                                                  |       |   |   |   |   |   |
| <b>Block III.B. Production Resources and Research &amp; Development</b>                                                                                                                                                                                                                                                                                                                                                                              |                                                                                                                                                                                         |       |   |   |   |   |   |
| <p>1. The Information Export Promotion Program is a government program that aims to encourage and facilitate exports by providing the necessary information. This program is implemented by several ministries (such as the Ministry of Trade, Kemenkop UKM, Ministry of Foreign Affairs), the provincial and municipal level offices, and other agencies</p> <p>2. Please answer according to the company's experience in the last three years.</p> |                                                                                                                                                                                         |       |   |   |   |   |   |
| No                                                                                                                                                                                                                                                                                                                                                                                                                                                   | Issue: Production and R&D Resources                                                                                                                                                     | Scale |   |   |   |   |   |
|                                                                                                                                                                                                                                                                                                                                                                                                                                                      |                                                                                                                                                                                         | 1     | 2 | 3 | 4 | 5 | 6 |
| 3B1                                                                                                                                                                                                                                                                                                                                                                                                                                                  | Your company has modern production technology and equipment for export purposes.                                                                                                        |       |   |   |   |   |   |
| 3B2                                                                                                                                                                                                                                                                                                                                                                                                                                                  | Your company can meet special production capacity for foreign markets.                                                                                                                  |       |   |   |   |   |   |
| 3B3                                                                                                                                                                                                                                                                                                                                                                                                                                                  | Your company has a patent/ brand/ royalty etc., related to export products.                                                                                                             |       |   |   |   |   |   |
| 3B4                                                                                                                                                                                                                                                                                                                                                                                                                                                  | Your company has technical knowledge for foreign market-specific production, such as quality standards, product requirements, technical regulations, packaging, security and licensing. |       |   |   |   |   |   |
| 3B5                                                                                                                                                                                                                                                                                                                                                                                                                                                  | Your company allocates research and development budget for export purposes, such as buying new machines, designing new products, conducting customer surveys, etc.                      |       |   |   |   |   |   |
| 3B6                                                                                                                                                                                                                                                                                                                                                                                                                                                  | Overall, limited production and R&D resources hinder planning/export activities.                                                                                                        |       |   |   |   |   |   |

| 3B7                                                                                                                                                                                                                                                                                                                                                    | If the answer to the previous question is on a scale of 5 to 7, then rank the problems related to production and R&D resources from the most (1) to the least challenging (4).                |       |   |   |   |   |   |   |
|--------------------------------------------------------------------------------------------------------------------------------------------------------------------------------------------------------------------------------------------------------------------------------------------------------------------------------------------------------|-----------------------------------------------------------------------------------------------------------------------------------------------------------------------------------------------|-------|---|---|---|---|---|---|
| 3B7_a                                                                                                                                                                                                                                                                                                                                                  | Limited access to raw materials (limited supply, uncompetitive prices, etc.)                                                                                                                  |       |   |   |   |   |   |   |
| 3B7_b                                                                                                                                                                                                                                                                                                                                                  | Unable to keep up with technological developments in the industry                                                                                                                             |       |   |   |   |   |   |   |
| 3B7_c                                                                                                                                                                                                                                                                                                                                                  | A limited number of skilled workers                                                                                                                                                           |       |   |   |   |   |   |   |
| 3B7_d                                                                                                                                                                                                                                                                                                                                                  | No budget allocation for product development                                                                                                                                                  |       |   |   |   |   |   |   |
| <b>Block III.C. Intellectual Resources</b>                                                                                                                                                                                                                                                                                                             |                                                                                                                                                                                               |       |   |   |   |   |   |   |
| 1. The Information Export Promotion Program is a government program that aims to encourage and facilitate exports by providing the necessary information. This program is implemented by several ministries (such as the Ministry of Trade, Kemenkop UKM, Ministry of Foreign Affairs), the provincial and municipal level offices, and other agencies |                                                                                                                                                                                               |       |   |   |   |   |   |   |
| 2. Please answer according to the company's experience in the last three years.                                                                                                                                                                                                                                                                        |                                                                                                                                                                                               |       |   |   |   |   |   |   |
|                                                                                                                                                                                                                                                                                                                                                        |                                                                                                                                                                                               |       |   |   |   |   |   |   |
| No                                                                                                                                                                                                                                                                                                                                                     | Issue: Intellectual Resources                                                                                                                                                                 | Scale |   |   |   |   |   |   |
|                                                                                                                                                                                                                                                                                                                                                        |                                                                                                                                                                                               | 1     | 2 | 3 | 4 | 5 | 6 | 7 |
| 3C1                                                                                                                                                                                                                                                                                                                                                    | Your company knows demands in foreign markets, such as product preferences, consumer preferences, demand volumes, purchasing power, competition, prices, and market sizes.                    |       |   |   |   |   |   |   |
| 3C2                                                                                                                                                                                                                                                                                                                                                    | Your company knows business practices in export destination countries, such as payment systems, business practices, business environment, cultural practices, and law and business contracts. |       |   |   |   |   |   |   |
| 3C3                                                                                                                                                                                                                                                                                                                                                    | Your company knows export regulations and documentation, such as permits, regulations, customs, and trade agreements.                                                                         |       |   |   |   |   |   |   |
| 3C4                                                                                                                                                                                                                                                                                                                                                    | Your company knows the logistics for export activities, such as documentation, inspection, transportation, logistics, customs, and payment systems.                                           |       |   |   |   |   |   |   |

| 3C5                                                                                                                                                                                                                                                                                                                                                                                                                                                  | Overall, limited intellectual resources, including market information, regulations and documents, and logistical needs, become obstacles in planning/export activities.          |       |   |   |   |   |   |   |
|------------------------------------------------------------------------------------------------------------------------------------------------------------------------------------------------------------------------------------------------------------------------------------------------------------------------------------------------------------------------------------------------------------------------------------------------------|----------------------------------------------------------------------------------------------------------------------------------------------------------------------------------|-------|---|---|---|---|---|---|
| 3C6                                                                                                                                                                                                                                                                                                                                                                                                                                                  | If the answer to the previous question is on a scale of 5 to 7, then rank the problems related to intellectual resources from the most (1) to the least challenging (3).         |       |   |   |   |   |   |   |
| 3C6_a                                                                                                                                                                                                                                                                                                                                                                                                                                                | Limited knowledge of export regulations and export documentation                                                                                                                 |       |   |   |   |   |   |   |
| 3C6_b                                                                                                                                                                                                                                                                                                                                                                                                                                                | Limited knowledge about demand in export destination countries                                                                                                                   |       |   |   |   |   |   |   |
| 3C6_c                                                                                                                                                                                                                                                                                                                                                                                                                                                | Limited knowledge of export logistics                                                                                                                                            |       |   |   |   |   |   |   |
| 3C6_d                                                                                                                                                                                                                                                                                                                                                                                                                                                | Limited knowledge about business practices in export destination countries                                                                                                       |       |   |   |   |   |   |   |
| <b>Block IV. Export-Related Organizational Capabilities</b>                                                                                                                                                                                                                                                                                                                                                                                          |                                                                                                                                                                                  |       |   |   |   |   |   |   |
| <b>Block IV.A. Ability to Identify Business Opportunities Abroad</b>                                                                                                                                                                                                                                                                                                                                                                                 |                                                                                                                                                                                  |       |   |   |   |   |   |   |
| <p>1. The Information Export Promotion Program is a government program that aims to encourage and facilitate exports by providing the necessary information. This program is implemented by several ministries (such as the Ministry of Trade, Kemenkop UKM, Ministry of Foreign Affairs), the provincial and municipal level offices, and other agencies</p> <p>2. Please answer according to the company's experience in the last three years.</p> |                                                                                                                                                                                  |       |   |   |   |   |   |   |
| No                                                                                                                                                                                                                                                                                                                                                                                                                                                   | Issue: Business Opportunity Capability                                                                                                                                           | Scale |   |   |   |   |   |   |
|                                                                                                                                                                                                                                                                                                                                                                                                                                                      |                                                                                                                                                                                  | 1     | 2 | 3 | 4 | 5 | 6 | 7 |
| 4A1                                                                                                                                                                                                                                                                                                                                                                                                                                                  | Your company can identify potential foreign markets for product marketing, including fast-growing markets, market trends that suit your products, and countries open for import. |       |   |   |   |   |   |   |
| 4A2                                                                                                                                                                                                                                                                                                                                                                                                                                                  | Your company can identify attractive overseas business opportunities.                                                                                                            |       |   |   |   |   |   |   |
| 4A3                                                                                                                                                                                                                                                                                                                                                                                                                                                  | Your company can contact potential overseas customers.                                                                                                                           |       |   |   |   |   |   |   |
| 4A4                                                                                                                                                                                                                                                                                                                                                                                                                                                  | Your company can obtain information about foreign markets, such as distribution centres, local competitors, domestic needs, prices, importers and buyers.                        |       |   |   |   |   |   |   |

|                                                                                                                                                                                                                                                                                                                                                                                                                                                      |                                                                                                                                                                          |              |          |          |          |          |          |          |
|------------------------------------------------------------------------------------------------------------------------------------------------------------------------------------------------------------------------------------------------------------------------------------------------------------------------------------------------------------------------------------------------------------------------------------------------------|--------------------------------------------------------------------------------------------------------------------------------------------------------------------------|--------------|----------|----------|----------|----------|----------|----------|
| 4A5                                                                                                                                                                                                                                                                                                                                                                                                                                                  | Overall, limited capability to identify business opportunities in foreign markets is an obstacle in planning/export activities.                                          |              |          |          |          |          |          |          |
| 4A6                                                                                                                                                                                                                                                                                                                                                                                                                                                  | If the answer to the previous question is on a scale of 5 to 7, then rank the problems related to education and training from the most (1) to the least challenging (4). |              |          |          |          |          |          |          |
| 4A6_a                                                                                                                                                                                                                                                                                                                                                                                                                                                | Limited capability to capture foreign business opportunities                                                                                                             |              |          |          |          |          |          |          |
| 4A6_b                                                                                                                                                                                                                                                                                                                                                                                                                                                | Limited capability to identify potential markets abroad                                                                                                                  |              |          |          |          |          |          |          |
| 4A6_c                                                                                                                                                                                                                                                                                                                                                                                                                                                | Limited capability to find buyers overseas                                                                                                                               |              |          |          |          |          |          |          |
| 4A6_d                                                                                                                                                                                                                                                                                                                                                                                                                                                | Limited capability to seek information on business opportunities and potential markets abroad                                                                            |              |          |          |          |          |          |          |
| <b>Block IV.B. Capability to Build Relationships</b>                                                                                                                                                                                                                                                                                                                                                                                                 |                                                                                                                                                                          |              |          |          |          |          |          |          |
| <p>1. The Information Export Promotion Program is a government program that aims to encourage and facilitate exports by providing the necessary information. This program is implemented by several ministries (such as the Ministry of Trade, Kemenkop UKM, Ministry of Foreign Affairs), the provincial and municipal level offices, and other agencies</p> <p>2. Please answer according to the company's experience in the last three years.</p> |                                                                                                                                                                          |              |          |          |          |          |          |          |
|                                                                                                                                                                                                                                                                                                                                                                                                                                                      |                                                                                                                                                                          |              |          |          |          |          |          |          |
|                                                                                                                                                                                                                                                                                                                                                                                                                                                      | <b>Issue: Relationship Building Capability</b>                                                                                                                           | <b>Scale</b> |          |          |          |          |          |          |
|                                                                                                                                                                                                                                                                                                                                                                                                                                                      |                                                                                                                                                                          | <b>1</b>     | <b>2</b> | <b>3</b> | <b>4</b> | <b>5</b> | <b>6</b> | <b>7</b> |
| 4B1                                                                                                                                                                                                                                                                                                                                                                                                                                                  | Your company understands the demands of customers in foreign markets.                                                                                                    |              |          |          |          |          |          |          |
| 4B2                                                                                                                                                                                                                                                                                                                                                                                                                                                  | Your company can find company representatives in foreign markets.                                                                                                        |              |          |          |          |          |          |          |
| 4B3                                                                                                                                                                                                                                                                                                                                                                                                                                                  | Your company can make business ties with partners in foreign markets.                                                                                                    |              |          |          |          |          |          |          |
| 4B4                                                                                                                                                                                                                                                                                                                                                                                                                                                  | Your company can build and maintain relationships with suppliers.                                                                                                        |              |          |          |          |          |          |          |
| 4B5                                                                                                                                                                                                                                                                                                                                                                                                                                                  | Overall, limited capability to build relationships in foreign markets is an obstacle in planning/export activities.                                                      |              |          |          |          |          |          |          |

|                                                                                                                                                                                                                                                                                                                                                        |                                                                                                                                                                                         |              |          |          |          |          |          |          |
|--------------------------------------------------------------------------------------------------------------------------------------------------------------------------------------------------------------------------------------------------------------------------------------------------------------------------------------------------------|-----------------------------------------------------------------------------------------------------------------------------------------------------------------------------------------|--------------|----------|----------|----------|----------|----------|----------|
| 4B6                                                                                                                                                                                                                                                                                                                                                    | If the answer to the previous question is on a scale of 5 to 7, then rank the problems related to the capability to build relationships from the most (1) to the least challenging (4). |              |          |          |          |          |          |          |
| 4B6_a                                                                                                                                                                                                                                                                                                                                                  | Limited ability to understand customer behaviour/demands in foreign markets                                                                                                             |              |          |          |          |          |          |          |
| 4B6_b                                                                                                                                                                                                                                                                                                                                                  | Limited ability to build relationships with representatives in foreign markets                                                                                                          |              |          |          |          |          |          |          |
| 4B6_c                                                                                                                                                                                                                                                                                                                                                  | Limited ability to build relationships with overseas suppliers                                                                                                                          |              |          |          |          |          |          |          |
| 4B6_d                                                                                                                                                                                                                                                                                                                                                  | Limited ability to build business ties with overseas partners                                                                                                                           |              |          |          |          |          |          |          |
| <b>Block IV. B. Ability to Build Relationships</b>                                                                                                                                                                                                                                                                                                     |                                                                                                                                                                                         |              |          |          |          |          |          |          |
| 1. The Information Export Promotion Program is a government program that aims to encourage and facilitate exports by providing the necessary information. This program is implemented by several ministries (such as the Ministry of Trade, Kemenkop UKM, Ministry of Foreign Affairs), the provincial and municipal level offices, and other agencies |                                                                                                                                                                                         |              |          |          |          |          |          |          |
| 2. Please answer according to the company's experience in the last three years.                                                                                                                                                                                                                                                                        |                                                                                                                                                                                         |              |          |          |          |          |          |          |
|                                                                                                                                                                                                                                                                                                                                                        | <b>Issue: Relationship Building Capability</b>                                                                                                                                          | <b>Scale</b> |          |          |          |          |          |          |
|                                                                                                                                                                                                                                                                                                                                                        |                                                                                                                                                                                         | <b>1</b>     | <b>2</b> | <b>3</b> | <b>4</b> | <b>5</b> | <b>6</b> | <b>7</b> |
| 4C1                                                                                                                                                                                                                                                                                                                                                    | Your company can apply new/innovative methods and ideas in production.                                                                                                                  |              |          |          |          |          |          |          |
| 4C2                                                                                                                                                                                                                                                                                                                                                    | Your company can develop new/innovative products for foreign markets.                                                                                                                   |              |          |          |          |          |          |          |
| 4C3                                                                                                                                                                                                                                                                                                                                                    | Your company can apply innovative export marketing methods and techniques.                                                                                                              |              |          |          |          |          |          |          |
| 4C4                                                                                                                                                                                                                                                                                                                                                    | Your company can identify trends/trends and movements of competitors in foreign markets.                                                                                                |              |          |          |          |          |          |          |
| 4C5                                                                                                                                                                                                                                                                                                                                                    | Overall, limited innovation capability becomes an obstacle in planning/export activities.                                                                                               |              |          |          |          |          |          |          |

|       |                                                                                                                                                                         |  |
|-------|-------------------------------------------------------------------------------------------------------------------------------------------------------------------------|--|
| 4C6   | If the answer to the previous question is on a scale of 5 to 7, then rank the problems related to innovation capability from the most (1) to the least challenging (4). |  |
| 4C6_a | Limited ability to apply new methods in the production process                                                                                                          |  |
| 4C6_b | Limited ability to develop new products                                                                                                                                 |  |
| 4C6_c | Limited ability to apply innovative marketing techniques                                                                                                                |  |
| 4C6_d | Limited ability to identify market trends and competitor behaviour in the market                                                                                        |  |

|                                                                                                                                                                                                                                                                                                                                                                                                                                                      |                                                                                                   |              |   |   |   |   |   |   |
|------------------------------------------------------------------------------------------------------------------------------------------------------------------------------------------------------------------------------------------------------------------------------------------------------------------------------------------------------------------------------------------------------------------------------------------------------|---------------------------------------------------------------------------------------------------|--------------|---|---|---|---|---|---|
| <b>Block V. Export Marketing Strategy</b>                                                                                                                                                                                                                                                                                                                                                                                                            |                                                                                                   |              |   |   |   |   |   |   |
| <b>Block VA Marketing Strategy Related to Products</b>                                                                                                                                                                                                                                                                                                                                                                                               |                                                                                                   |              |   |   |   |   |   |   |
| <p>1. The Information Export Promotion Program is a government program that aims to encourage and facilitate exports by providing the necessary information. This program is implemented by several ministries (such as the Ministry of Trade, Kemenkop UKM, Ministry of Foreign Affairs), the provincial and municipal level offices, and other agencies</p> <p>2. Please answer according to the company's experience in the last three years.</p> |                                                                                                   |              |   |   |   |   |   |   |
|                                                                                                                                                                                                                                                                                                                                                                                                                                                      |                                                                                                   |              |   |   |   |   |   |   |
|                                                                                                                                                                                                                                                                                                                                                                                                                                                      | <b>Issue: Product-Related Marketing Strategy</b>                                                  | <b>Scale</b> |   |   |   |   |   |   |
|                                                                                                                                                                                                                                                                                                                                                                                                                                                      |                                                                                                   | 1            | 2 | 3 | 4 | 5 | 6 | 7 |
| 5A1                                                                                                                                                                                                                                                                                                                                                                                                                                                  | Your company can meet the standards/quality of products demanded by customers in foreign markets. |              |   |   |   |   |   |   |
| 5A2                                                                                                                                                                                                                                                                                                                                                                                                                                                  | Your company can meet the preferences of foreign customers in terms of design/style.              |              |   |   |   |   |   |   |
| 5A3                                                                                                                                                                                                                                                                                                                                                                                                                                                  | Your company can meet the demands of overseas customers in terms of packaging and labelling.      |              |   |   |   |   |   |   |
| 5A4                                                                                                                                                                                                                                                                                                                                                                                                                                                  | Your company can meet the demands of foreign customers in terms of branding.                      |              |   |   |   |   |   |   |



|                                                                                                                                                                                                                                                                                                                                                                                                                                                      |                                                                                                                                                                                |              |   |   |   |   |   |   |
|------------------------------------------------------------------------------------------------------------------------------------------------------------------------------------------------------------------------------------------------------------------------------------------------------------------------------------------------------------------------------------------------------------------------------------------------------|--------------------------------------------------------------------------------------------------------------------------------------------------------------------------------|--------------|---|---|---|---|---|---|
| 5A5                                                                                                                                                                                                                                                                                                                                                                                                                                                  | Your company can meet the demands of overseas customers in terms of warranty/after-sales service.                                                                              |              |   |   |   |   |   |   |
| 5A6                                                                                                                                                                                                                                                                                                                                                                                                                                                  | Overall, limited abilities in product marketing strategies become an obstacle in planning/export activities.                                                                   |              |   |   |   |   |   |   |
| 5A7                                                                                                                                                                                                                                                                                                                                                                                                                                                  | If the answer to the previous question is on a scale of 5 to 7, then rank the problems related to product marketing strategies from the most (1) to the least challenging (5). |              |   |   |   |   |   |   |
| 5A7_a                                                                                                                                                                                                                                                                                                                                                                                                                                                | Limited ability to meet the demands of overseas customers in terms of standards/quality.                                                                                       |              |   |   |   |   |   |   |
| 5A7_b                                                                                                                                                                                                                                                                                                                                                                                                                                                | Limited ability to meet the demands of overseas customers in the design aspect.                                                                                                |              |   |   |   |   |   |   |
| 5A7_c                                                                                                                                                                                                                                                                                                                                                                                                                                                | Limited ability to meet the demands of overseas customers in terms of packaging and labelling.                                                                                 |              |   |   |   |   |   |   |
| 5A7_d                                                                                                                                                                                                                                                                                                                                                                                                                                                | Limited ability to meet the demands of overseas customers in the after-sales service aspect.                                                                                   |              |   |   |   |   |   |   |
| 5A7_e                                                                                                                                                                                                                                                                                                                                                                                                                                                | Limited ability to meet the demands of foreign customers in the aspect of branding.                                                                                            |              |   |   |   |   |   |   |
| <b>VB Block Price-Related Marketing Strategy</b>                                                                                                                                                                                                                                                                                                                                                                                                     |                                                                                                                                                                                |              |   |   |   |   |   |   |
| <p>1. The Information Export Promotion Program is a government program that aims to encourage and facilitate exports by providing the necessary information. This program is implemented by several ministries (such as the Ministry of Trade, Kemenkop UKM, Ministry of Foreign Affairs), the provincial and municipal level offices, and other agencies</p> <p>2. Please answer according to the company's experience in the last three years.</p> |                                                                                                                                                                                |              |   |   |   |   |   |   |
|                                                                                                                                                                                                                                                                                                                                                                                                                                                      |                                                                                                                                                                                |              |   |   |   |   |   |   |
|                                                                                                                                                                                                                                                                                                                                                                                                                                                      | <b>Issue: Marketing Strategy Related to Pricing</b>                                                                                                                            | <b>Scale</b> |   |   |   |   |   |   |
|                                                                                                                                                                                                                                                                                                                                                                                                                                                      |                                                                                                                                                                                | 1            | 2 | 3 | 4 | 5 | 6 | 7 |
| 5B1                                                                                                                                                                                                                                                                                                                                                                                                                                                  | Your company offers attractive profit margins to partners/ importers in foreign markets.                                                                                       |              |   |   |   |   |   |   |

|                                                                                                                                                                                                                                                                                                                                                                                                                                                                                             |                                                                                                                                                               |              |   |   |   |   |   |   |
|---------------------------------------------------------------------------------------------------------------------------------------------------------------------------------------------------------------------------------------------------------------------------------------------------------------------------------------------------------------------------------------------------------------------------------------------------------------------------------------------|---------------------------------------------------------------------------------------------------------------------------------------------------------------|--------------|---|---|---|---|---|---|
| 5B2                                                                                                                                                                                                                                                                                                                                                                                                                                                                                         | Your company offers attractive payment schemes for partners/ importers in foreign markets, such as terms of payment, payment terms and flexibility, etc.      |              |   |   |   |   |   |   |
| 5B3                                                                                                                                                                                                                                                                                                                                                                                                                                                                                         | Your company offers attractive sales terms for partners/ importers in foreign markets.                                                                        |              |   |   |   |   |   |   |
| 5B4                                                                                                                                                                                                                                                                                                                                                                                                                                                                                         | Your company applies price matching/ price competitive compared to the price offered by competitors in foreign markets.                                       |              |   |   |   |   |   |   |
| 5B5                                                                                                                                                                                                                                                                                                                                                                                                                                                                                         | Your company offers a price that satisfies end customers in retail-level foreign markets.                                                                     |              |   |   |   |   |   |   |
| 5B6                                                                                                                                                                                                                                                                                                                                                                                                                                                                                         | Overall, limited marketing strategies related to pricing are an obstacle in planning/export activities.                                                       |              |   |   |   |   |   |   |
| 5B7                                                                                                                                                                                                                                                                                                                                                                                                                                                                                         | If the answer to the previous question is on a scale of 5 to 7, then rank the problems related to the pricing from the most (1) to the least challenging (4). |              |   |   |   |   |   |   |
| 5B7_a                                                                                                                                                                                                                                                                                                                                                                                                                                                                                       | Limitations in offering attractive profit margins to overseas importers.                                                                                      |              |   |   |   |   |   |   |
| 5B7_b                                                                                                                                                                                                                                                                                                                                                                                                                                                                                       | Limitations in offering attractive payment schemes to importers in foreign markets.                                                                           |              |   |   |   |   |   |   |
| 5B7_c                                                                                                                                                                                                                                                                                                                                                                                                                                                                                       | Limitations of applying price matching/price against the price offered by competitors in foreign markets.                                                     |              |   |   |   |   |   |   |
| 5B7_d                                                                                                                                                                                                                                                                                                                                                                                                                                                                                       | Limitations in offering prices that satisfy overseas customers.                                                                                               |              |   |   |   |   |   |   |
| <b>Distribution-Related Marketing Strategy VC Block</b>                                                                                                                                                                                                                                                                                                                                                                                                                                     |                                                                                                                                                               |              |   |   |   |   |   |   |
| <ol style="list-style-type: none"> <li>The Information Export Promotion Program is a government program that aims to encourage and facilitate exports by providing the necessary information. This program is implemented by several ministries (such as the Ministry of Trade, Kemenkop UKM, Ministry of Foreign Affairs), the provincial and municipal level offices, and other agencies</li> <li>Please answer according to the company's experience in the last three years.</li> </ol> |                                                                                                                                                               |              |   |   |   |   |   |   |
|                                                                                                                                                                                                                                                                                                                                                                                                                                                                                             | <b>Issue: Distribution Strategy</b>                                                                                                                           | <b>Scale</b> |   |   |   |   |   |   |
|                                                                                                                                                                                                                                                                                                                                                                                                                                                                                             |                                                                                                                                                               | 1            | 2 | 3 | 4 | 5 | 6 | 7 |

|                                                                                                                                                                                                                                                                                                                                                                                                                                                                                                   |                                                                                                                                                                           |  |  |              |   |   |   |   |   |   |
|---------------------------------------------------------------------------------------------------------------------------------------------------------------------------------------------------------------------------------------------------------------------------------------------------------------------------------------------------------------------------------------------------------------------------------------------------------------------------------------------------|---------------------------------------------------------------------------------------------------------------------------------------------------------------------------|--|--|--------------|---|---|---|---|---|---|
| 5C1                                                                                                                                                                                                                                                                                                                                                                                                                                                                                               | Your company can maintain fast delivery of goods to foreign markets, with fast services, high quality, and affordable prices.                                             |  |  |              |   |   |   |   |   |   |
| 5C2                                                                                                                                                                                                                                                                                                                                                                                                                                                                                               | Your company can replenish foreign market inventory quickly and effectively (with a precise order quantity).                                                              |  |  |              |   |   |   |   |   |   |
| 5C3                                                                                                                                                                                                                                                                                                                                                                                                                                                                                               | Your company has adequate distribution coverage in foreign markets.                                                                                                       |  |  |              |   |   |   |   |   |   |
| 5C4                                                                                                                                                                                                                                                                                                                                                                                                                                                                                               | Your company can manage distributors/agents for overseas markets effectively.                                                                                             |  |  |              |   |   |   |   |   |   |
| 5C5                                                                                                                                                                                                                                                                                                                                                                                                                                                                                               | Your company can effectively respond to orders from overseas customers (fast order processing and delivery).                                                              |  |  |              |   |   |   |   |   |   |
| 5C6                                                                                                                                                                                                                                                                                                                                                                                                                                                                                               | Overall, limited distribution strategies becomes an obstacle in planning/export activities.                                                                               |  |  |              |   |   |   |   |   |   |
| 5C7                                                                                                                                                                                                                                                                                                                                                                                                                                                                                               | If the answer to the previous question is on a scale of 5 to 7, then rank the problems related to distribution strategies from the most (1) to the least challenging (4). |  |  |              |   |   |   |   |   |   |
| 5C7_a                                                                                                                                                                                                                                                                                                                                                                                                                                                                                             | Limitations in delivery speed to foreign markets.                                                                                                                         |  |  |              |   |   |   |   |   |   |
| 5C7_b                                                                                                                                                                                                                                                                                                                                                                                                                                                                                             | Limitations in inventory for foreign markets management.                                                                                                                  |  |  |              |   |   |   |   |   |   |
| 5C7_c                                                                                                                                                                                                                                                                                                                                                                                                                                                                                             | Limitations in overseas distributors/agents management.                                                                                                                   |  |  |              |   |   |   |   |   |   |
| 5C7_d                                                                                                                                                                                                                                                                                                                                                                                                                                                                                             | Limitations in providing fast response to orders from overseas markets.                                                                                                   |  |  |              |   |   |   |   |   |   |
| <b>Promotion-Related Marketing Strategy VD Block</b>                                                                                                                                                                                                                                                                                                                                                                                                                                              |                                                                                                                                                                           |  |  |              |   |   |   |   |   |   |
| <ol style="list-style-type: none"> <li>1. The Information Export Promotion Program is a government program that aims to encourage and facilitate exports by providing the necessary information. This program is implemented by several ministries (such as the Ministry of Trade, Kemenkop UKM, Ministry of Foreign Affairs), the provincial and municipal level offices, and other agencies</li> <li>2. Please answer according to the company's experience in the last three years.</li> </ol> |                                                                                                                                                                           |  |  |              |   |   |   |   |   |   |
|                                                                                                                                                                                                                                                                                                                                                                                                                                                                                                   | <b>Issue: Promotion Strategies</b>                                                                                                                                        |  |  | <b>Scale</b> |   |   |   |   |   |   |
|                                                                                                                                                                                                                                                                                                                                                                                                                                                                                                   |                                                                                                                                                                           |  |  | 1            | 2 | 3 | 4 | 5 | 6 | 7 |
| 5D1                                                                                                                                                                                                                                                                                                                                                                                                                                                                                               | Your company can increase or maintain sales promotion activities and strategies in foreign markets.                                                                       |  |  |              |   |   |   |   |   |   |

|       |                                                                                                                                                                          |  |  |  |  |  |  |  |  |
|-------|--------------------------------------------------------------------------------------------------------------------------------------------------------------------------|--|--|--|--|--|--|--|--|
| 5D2   | Your company can improve or maintain public relations with distributors, agents, and other partners in foreign markets.                                                  |  |  |  |  |  |  |  |  |
| 5D3   | Your company can increase or maintain personal selling in foreign markets.                                                                                               |  |  |  |  |  |  |  |  |
| 5D4   | Your company can increase or maintain advertising (website information, social media, digital marketing, etc.) in foreign markets.                                       |  |  |  |  |  |  |  |  |
| 5D5   | Your company can increase or maintain direct sales and marketing in foreign markets.                                                                                     |  |  |  |  |  |  |  |  |
| 5D6   | Overall, limited promotional strategies are an obstacle in planning/export activities.                                                                                   |  |  |  |  |  |  |  |  |
| 5C7   | If the answer to the previous question is on a scale of 5 to 7, then rank the problems related to promotional strategies from the most (1) to the least challenging (4). |  |  |  |  |  |  |  |  |
| 5C7_a | Limitations in maintaining sales promotions in foreign markets.                                                                                                          |  |  |  |  |  |  |  |  |
| 5C7_b | Limitations in maintaining advertising in foreign markets.                                                                                                               |  |  |  |  |  |  |  |  |
| 5C7_c | Limitations in maintaining/promoting direct marketing in foreign markets.                                                                                                |  |  |  |  |  |  |  |  |
| 5C7_d | Limitations in maintaining/promoting personal selling in foreign markets (online sales and e-commerce)                                                                   |  |  |  |  |  |  |  |  |

|                                                                                                                                                                                                                                                                                                                                                                                                             |              |
|-------------------------------------------------------------------------------------------------------------------------------------------------------------------------------------------------------------------------------------------------------------------------------------------------------------------------------------------------------------------------------------------------------------|--------------|
| <b>Block VI. Export Competitive Advantage</b>                                                                                                                                                                                                                                                                                                                                                               |              |
| <b>Block VI.A. Export Competitive Advantage from Cost Aspect</b>                                                                                                                                                                                                                                                                                                                                            |              |
| <b>CHARGING INSTRUCTIONS</b>                                                                                                                                                                                                                                                                                                                                                                                |              |
| <ol style="list-style-type: none"> <li>For Block 6A (Competitive Advantage), you are asked to respond to the questions below according to your company's circumstances over the past three years.</li> <li>A scale of 1 represents "<b>worse</b>", and a scale of 7 represents "<b>better</b>" conditions.</li> <li>Please answer according to the company's experience in the last three years.</li> </ol> |              |
| <b>Issue: Cost Advantage</b>                                                                                                                                                                                                                                                                                                                                                                                | <b>Scale</b> |

|                                                                                                                                                                                                                                                                                                                                                                                                                                                                                                                                  |                                                                                                                            | 1            | 2        | 3        | 4        | 5        | 6        | 7        |
|----------------------------------------------------------------------------------------------------------------------------------------------------------------------------------------------------------------------------------------------------------------------------------------------------------------------------------------------------------------------------------------------------------------------------------------------------------------------------------------------------------------------------------|----------------------------------------------------------------------------------------------------------------------------|--------------|----------|----------|----------|----------|----------|----------|
| <b>6A1</b>                                                                                                                                                                                                                                                                                                                                                                                                                                                                                                                       | How is the cost of raw materials incurred by your company to produce export goods?                                         |              |          |          |          |          |          |          |
| <b>6A2</b>                                                                                                                                                                                                                                                                                                                                                                                                                                                                                                                       | How is the unit cost (average cost) incurred by your company for the production of export goods?                           |              |          |          |          |          |          |          |
| <b>6A3</b>                                                                                                                                                                                                                                                                                                                                                                                                                                                                                                                       | How is the distribution cost incurred by your company for the production of export goods?                                  |              |          |          |          |          |          |          |
| <b>6A4</b>                                                                                                                                                                                                                                                                                                                                                                                                                                                                                                                       | How is the sales cost incurred by your company to produce export goods?                                                    |              |          |          |          |          |          |          |
| <p><b>Block VI.B. Export Competitive Advantage from Product Aspect</b><br/> <b>CHARGING INSTRUCTIONS</b></p> <ol style="list-style-type: none"> <li>For Block 6A (Competitive Advantage), you are asked to respond to each of the questions below according to your company's circumstances over the past three years.</li> <li>A scale of 1 represents “<b>worse</b>”, and a scale of 7 represents “<b>better</b>” conditions.</li> <li>Please answer according to the company's experience in the last three years.</li> </ol> |                                                                                                                            |              |          |          |          |          |          |          |
|                                                                                                                                                                                                                                                                                                                                                                                                                                                                                                                                  | <b>Issue: Product Aspect Advantage</b>                                                                                     | <b>Scale</b> |          |          |          |          |          |          |
|                                                                                                                                                                                                                                                                                                                                                                                                                                                                                                                                  |                                                                                                                            | <b>1</b>     | <b>2</b> | <b>3</b> | <b>4</b> | <b>5</b> | <b>6</b> | <b>7</b> |
| <b>6 B 1</b>                                                                                                                                                                                                                                                                                                                                                                                                                                                                                                                     | How is your company's current product differentiation in foreign markets?                                                  |              |          |          |          |          |          |          |
| <b>6 B 2</b>                                                                                                                                                                                                                                                                                                                                                                                                                                                                                                                     | How is your company's current product introduction in foreign markets?                                                     |              |          |          |          |          |          |          |
| <b>6 B 3</b>                                                                                                                                                                                                                                                                                                                                                                                                                                                                                                                     | What kind of product range (both horizontal and vertical variations) does your company currently offer in foreign markets? |              |          |          |          |          |          |          |
| <b>6 B 4</b>                                                                                                                                                                                                                                                                                                                                                                                                                                                                                                                     | How is your company's current brand awareness/recognition in foreign markets?                                              |              |          |          |          |          |          |          |
| <p><b>Block VI.C. Export Competitive Advantage from the Service Aspect</b><br/> <b>CHARGING INSTRUCTIONS</b></p>                                                                                                                                                                                                                                                                                                                                                                                                                 |                                                                                                                            |              |          |          |          |          |          |          |

1. For Block 6A (Competitive Advantage), you are asked to respond to each of the questions below according to your company's circumstances over the past three years.
2. A scale of 1 represents “**worse**” and a scale of 7 represents “**better**” conditions.
3. Please answer according to the company's experience in the last three years.

|            | Issue: Product Aspect Advantage                                                                                                   | Scale |   |   |   |   |   |   |
|------------|-----------------------------------------------------------------------------------------------------------------------------------|-------|---|---|---|---|---|---|
|            |                                                                                                                                   | 1     | 2 | 3 | 4 | 5 | 6 | 7 |
| <b>6C1</b> | How is the availability of your company's products in foreign markets?                                                            |       |   |   |   |   |   |   |
| <b>6C2</b> | How fast and reliable is the delivery of your company's products in foreign markets?                                              |       |   |   |   |   |   |   |
| <b>6C3</b> | How are your company's pre- and after-sales services in overseas markets?                                                         |       |   |   |   |   |   |   |
| <b>6C4</b> | How is the ease of public access to your company's products in foreign markets? (Ready-stock products, available in stores, etc.) |       |   |   |   |   |   |   |

### Block VII. Export Market Performance

#### CHARGING INSTRUCTIONS

1. For Block 7 (Export Market Performance), you are asked to respond to each of the statements below per your company's circumstances.
2. A scale of 1 represents “**VERY LOW**” and 7 represents “**VERY HIGH**”.
3. Please answer according to the company's experience in the last three years.

|            | Issue: Overseas Market Performance                            | Scale |   |   |   |   |   |   |
|------------|---------------------------------------------------------------|-------|---|---|---|---|---|---|
|            |                                                               | 1     | 2 | 3 | 4 | 5 | 6 | 7 |
| <b>701</b> | Able to provide added value for customers in foreign markets. |       |   |   |   |   |   |   |
| <b>702</b> | Able to retain valuable customers in foreign markets.         |       |   |   |   |   |   |   |

|            |                                                            |  |  |  |  |  |  |  |
|------------|------------------------------------------------------------|--|--|--|--|--|--|--|
| <b>703</b> | Able to obtain new customers in foreign markets.           |  |  |  |  |  |  |  |
| <b>704</b> | Able to increase reputation in foreign markets.            |  |  |  |  |  |  |  |
| <b>705</b> | Able to increase customer satisfaction in foreign markets. |  |  |  |  |  |  |  |
| <b>706</b> | Able to meet customers' expectations in foreign markets.   |  |  |  |  |  |  |  |

| <b>Block VIII. Export Financial Performance</b>                                                                                                                                                                                                                                                                                                                   |                                                                         |       |   |   |   |   |   |   |
|-------------------------------------------------------------------------------------------------------------------------------------------------------------------------------------------------------------------------------------------------------------------------------------------------------------------------------------------------------------------|-------------------------------------------------------------------------|-------|---|---|---|---|---|---|
| <b>CHARGING INSTRUCTIONS</b>                                                                                                                                                                                                                                                                                                                                      |                                                                         |       |   |   |   |   |   |   |
| <ol style="list-style-type: none"> <li>1. For Block 7 (Export Financial Performance), you are asked to respond to each of the statements below per your company's circumstances.</li> <li>2. A scale of 1 represents "VERY LOW" and 7 represents "VERY HIGH".</li> <li>3. Please answer according to the company's experience in the last three years.</li> </ol> |                                                                         |       |   |   |   |   |   |   |
| No                                                                                                                                                                                                                                                                                                                                                                | Issue: <b>Export Financial Performance</b>                              | Scale |   |   |   |   |   |   |
|                                                                                                                                                                                                                                                                                                                                                                   |                                                                         | 1     | 2 | 3 | 4 | 5 | 6 | 7 |
| <b>801</b>                                                                                                                                                                                                                                                                                                                                                        | Able to increase sales volume in foreign markets.                       |       |   |   |   |   |   |   |
| <b>802</b>                                                                                                                                                                                                                                                                                                                                                        | Able to increase export market share/niche.                             |       |   |   |   |   |   |   |
| <b>803</b>                                                                                                                                                                                                                                                                                                                                                        | Able to increase export profitability.                                  |       |   |   |   |   |   |   |
| <b>804</b>                                                                                                                                                                                                                                                                                                                                                        | Able to increase the intensity of export sales.                         |       |   |   |   |   |   |   |
| <b>805</b>                                                                                                                                                                                                                                                                                                                                                        | Able to increase Return on investment (ROI) from export activities.     |       |   |   |   |   |   |   |
| <b>806</b>                                                                                                                                                                                                                                                                                                                                                        | Able to increase Return on Assets (ROA) dedicated to export activities. |       |   |   |   |   |   |   |
